# Supplementary material for: Photopharmacology of Ion Channels through the Light of the Computational Microscope
Source: MDPI journal article supplement (doi:10.3390/ijms222112072), 2021-11-08
Supplement: s1 [file s1]

# Photopharmacology of ion channels through the light of the computational microscope

## Supplementary Material

Alba Nin-Hill<sup>1</sup>, Nicolas P. Mueller<sup>2,3</sup>, Carla Molteni<sup>4</sup>, Carme Rovira<sup>1,5</sup> and Mercedes Alfonso-Prieto<sup>2,6,\*</sup>

<sup>1</sup> Departament de Química Inorgànica i Orgànica (Secció de Química Orgànica) and Institut de Química Teòrica i Computacional (IQTUB), Universitat de Barcelona, 08028 Barcelona (Spain)

<sup>2</sup> Institute for Advanced Simulations IAS-5 and Institute of Neuroscience and Medicine INM-9, Computational Biomedicine, Forschungszentrum Jülich, Jülich 52425 (Germany)

<sup>3</sup> Faculty of Mathematics and Natural Sciences, Heinrich-Heine-University Düsseldorf, Universitätsstr.1, 40225 Düsseldorf (Germany)

<sup>4</sup> Physics Department, King's College London, Strand, London WC2R 2LS (U.K.)

<sup>5</sup> Institució Catalana de Recerca i Estudis Avançats (ICREA), 08020 Barcelona (Spain)

<sup>6</sup> Cécile and Oskar Vogt Institute for Brain Research, University Hospital Düsseldorf, Medical Faculty, Heinrich Heine University Düsseldorf, Düsseldorf 40225 (Germany)

\* Correspondence: [m.alfonso-prieto@fz-juelich.de](mailto:m.alfonso-prieto@fz-juelich.de)

**Table S1.** Computational studies of photoswitchable ligands targeting voltage-gated ion channels. Both photochromic ligands (PCLs) and photoswitchable tethered ligands (PTLs) are included.

| Target protein    | Tethering mutations | Photoswitchable ligand                                       | Type                | Activity             | Computational methods                                           | Aim                                                                                         | Reference |
|-------------------|---------------------|--------------------------------------------------------------|---------------------|----------------------|-----------------------------------------------------------------|---------------------------------------------------------------------------------------------|-----------|
| Shaker Kv channel | n.a.                | QAQ (quaternary ammonium + azobenzene + quaternary ammonium) | PCL <sup>[i]</sup>  | Pore blocker (trans) | Molecular docking                                               | Rationalization of differential effect of trans and cis isomers                             | [1]       |
| Cav1.2 channel    | n.a.                | FHU-779 (azobenzene + diltiazem)                             | PCL                 | Pore blocker         | Homology modeling + Molecular docking (Montecarlo minimization) | Rationalization of differential effect of trans and cis isomers                             | [2]       |
| Nav1.4 channel    | n.a.                | azobenzene & p-diamino-azobenzene                            | PCL <sup>[ii]</sup> | Pore blocker (trans) | Molecular dynamics + Free energy calculations (GaMD + MM/PBSA)  | Understanding the mechanism of pore blocker binding                                         | [3]       |
| TRPC3 channel     | n.a.                | OptoDARG (azobenzene-containing-arachidonyl + glycerol)      | PCL                 | Activator            | Homology modeling                                               | Structure-guided mutagenesis screening to understand the lipid-sensing and gating mechanism | [4]       |

[i] QAQ acts as light-regulated open channel blocker not only for voltage-gated K<sup>+</sup> channels, but also voltage-gated Na<sup>+</sup> and Ca<sup>2+</sup> channels [1].

[ii] Azobenzene and p-diaminoazobenzene were used as simplified models of the light-sensitive pore blocker QAQ [3].

**Table S2.** Computational studies of photoswitchable ligands targeting cationic pentameric ligand-gated ion channels.

| Target protein              | Tethering mutations         | Photoswitchable ligand                       | Type                  | Activity                    | Computational methods                                        | Aim                                                                                                                                                         | Reference |
|-----------------------------|-----------------------------|----------------------------------------------|-----------------------|-----------------------------|--------------------------------------------------------------|-------------------------------------------------------------------------------------------------------------------------------------------------------------|-----------|
| nAChR ( $\alpha 4\beta 2$ ) | LinAChR ( $\beta 2(E61C)$ ) | MAACh (maleimide + azobenzene + acylcholine) | PTL <sup>[i]</sup>    | Agonist (cis)               | Homology modeling+ Molecular docking                         | Structure-guided mutagenesis screening to identify possible tethering sites (Cys mutants) & Rationalization of differential effect of trans and cis isomers | [5]       |
| nAChR                       | n.a.                        | AMI-10 (azobenzene + bis- imidacloprid)      | PCL <sup>[ii]</sup>   | Agonist (cis)               | Molecular docking                                            | Rationalization of differential effect of trans and cis isomers                                                                                             | [6]       |
| 5-HT3R                      | n.a.                        | Pro8*                                        | n.a. <sup>[iii]</sup> | Endogenous molecular switch | Molecular dynamics + Free energy calculations (metadynamics) | Molecular and energetic insight into the connection between prolyl isomerization and channel gating                                                         | [7,8]     |

[i] Modeling of MAHoCh (maleimide+ azobenzene+ homocholine), another PTL reported in reference [5], was not attempted, due to the lack of ligand similarity between this PTL and the antagonists for which crystal structures bound to AChBP were available at the time.

[ii] The AchBP was used as proxy of the target nAChR in flies.

[iii] Although the endogenous Pro molecular switch of 5HT3R is not a photoswitchable ligand, it also undergoes *trans-cis* isomerization resulting in changes in channel activity.

**Table S3.** Computational studies of photoswitchable ligands targeting anionic pentameric ligand-gated ion channels.

| Target protein                                     | Tethering mutations                         | Photoswitchable ligand                               | Type | Activity                            | Computational methods                 | Aim                                                                                                                                                         | Reference |
|----------------------------------------------------|---------------------------------------------|------------------------------------------------------|------|-------------------------------------|---------------------------------------|-------------------------------------------------------------------------------------------------------------------------------------------------------------|-----------|
| GABA <sub>A</sub> R ( $\alpha 1\beta 2\gamma 2S$ ) | LiGABA <sub>A</sub> R ( $\alpha 1(T125C)$ ) | MAB-0 (maleimide+ azobenzene+ 4-hydroxy-benzylamine) | PTL  | Antagonist (trans)                  | Homology modeling+ Molecular docking  | Structure-guided mutagenesis screening to identify possible tethering sites (Cys mutants) & Rationalization of differential effect of trans and cis isomers | [9]       |
| GABA <sub>A</sub> R ( $\alpha 1\beta 2\gamma 2L$ ) | n.a.                                        | Azogabazine                                          | PTL  | Antagonist (trans)                  | Homology modeling + Molecular docking | Rationalization of differential effect of trans and cis isomers & Design of validation mutagenesis                                                          | [10]      |
| GABA <sub>A</sub> R ( $\alpha 1\beta 3\gamma 2$ )  | $\beta 3(M283C)$<br>$\alpha 1(V227C)$       | MAP20 (methanethio sulfonate+ azobenzene+ propofol)  | PTL  | Positive allosteric modulator (cis) | Homology modeling + Molecular docking | Identification of possible tethering sites (Cys mutants) & Rationalization of photomodulation differences depending on the Cys mutant                       | [11]      |

**Table S3. (cont.)** Computational studies of photoswitchable ligands targeting anionic pentameric ligand-gated ion channels.

| Target protein                                                                                              | Tethering mutations | Photoswitchable ligand | Type | Activity                            | Computational methods                 | Aim                                                                                                                  | Reference |
|-------------------------------------------------------------------------------------------------------------|---------------------|------------------------|------|-------------------------------------|---------------------------------------|----------------------------------------------------------------------------------------------------------------------|-----------|
| GABA <sub>A</sub> R ( $\alpha 1\beta 2\gamma 2$ ) and GABA <sub>A</sub> R- $\rho$ ( $\rho 1$ and $\rho 2$ ) | n.a.                | Azo-NZ1                | PCL  | Pore blocker (trans)                | Homology modeling + Molecular docking | Rationalization of the differential effect of trans and cis isomers, subtype selectivity and the effect of mutations | [12]      |
| GlyR ( $\alpha 2$ and $\alpha 2\beta$ )                                                                     | n.a.                | azo-NZ1                | PCL  | Pore blocker (trans)                | Homology modeling + Molecular docking | Rationalization of the differential effect of trans and cis isomers, subtype selectivity and the effect of mutations | [13]      |
| GlyR ( $\alpha 2$ and $\alpha 2\beta$ )                                                                     | n.a.                | Glyght                 | PCL  | Negative allosteric modulator (cis) | Homology modeling + Molecular docking | Rationalization of the differential effect of trans and cis isomers                                                  | [14]      |

**Table S4.** Computational studies of photoswitchable ligands targeting ionotropic glutamate receptors and ATP-dependent purinergic receptors.

| Target protein                          | Tethering mutations                | Photoswitchable ligand                        | Type                | Activity                                             | Computational methods                                                  | Aim                                                                                     | Reference |
|-----------------------------------------|------------------------------------|-----------------------------------------------|---------------------|------------------------------------------------------|------------------------------------------------------------------------|-----------------------------------------------------------------------------------------|-----------|
| Kainate receptor (GluK2)                | n.a.                               | gluazo (glutamate+ azobenzene)                | PCL                 | Partial agonist (trans)                              | Experimental structure inspection + Manual docking                     | Rationalization of of the differential effect of trans and cis isomers                  | [15]      |
| Kainate receptor (GluK2)                | n.a.                               | gluazo (glutamate+ azobenzene)                | PCL                 | Partial agonist (trans)                              | Molecular dynamics + Free energy calculations (US)                     | Rationalization of the differential effect of trans and cis isomers                     | [16]      |
| Kainate receptor (GluR6) <sup>[i]</sup> | LiGluR6 (L439C)<br>LiGluR6 (G486C) | MAG0 (maleimide+ azobenzene+ glutamate)       | PTL <sup>[ii]</sup> | Agonist (cis or trans depending on the MAG compound) | Molecular dynamics + Free energy calculations (US)                     | Rationalization of the different isomer preference depending on the attachment Cys site | [17]      |
| AMPA receptor (GluA2)                   | n.a.                               | ATA-3 compound (azobenzene+ tetrazolyl+ AMPA) | PCL                 | Agonist (trans)                                      | Molecular docking + Molecular dynamics + Free energy calculations (US) | Rationalization of the differential effect of trans and cis isomers                     | [18]      |

[i] The glutamate ionotropic receptor kainate type subunit 2 is referred to as either GluR6 or GluK2; the latter is the recommended name in the UniProt database.

**Table S4. (cont.)** Computational studies of photoswitchable ligands targeting ionotropic glutamate receptors and ATP-dependent purinergic receptors.

| Target protein        | Tethering mutations         | Photoswitchable ligand                    | Type | Activity                                | Computational methods                                                  | Aim                                                                                                                                                 | Reference |
|-----------------------|-----------------------------|-------------------------------------------|------|-----------------------------------------|------------------------------------------------------------------------|-----------------------------------------------------------------------------------------------------------------------------------------------------|-----------|
| GluD receptor (GluD2) | LiGluD2 (I677C)             | MAGu (maleimide+ azobenzene+ guanidinium) | PTL  | Pore blocker                            | Homology modeling + Molecular covalent docking + Ion pore calculations | Structure-guided mutagenesis screening to identify possible tethering sites (Cys mutants) & Rationalization of the unusual pore blocking properties | [19]      |
| P2X2 receptor         | I336C N353C <sup>[ii]</sup> | MAM (maleimide+ azobenze+ maleimide)      | PTL  | Molecular tweezer (Cys-Cys crosslinker) | Molecular dynamics                                                     | Derivation of structural constraints to understand the (ATP-triggered) pore opening mechanism                                                       | [20]      |

[ii] Mutants considered in the MD simulations.

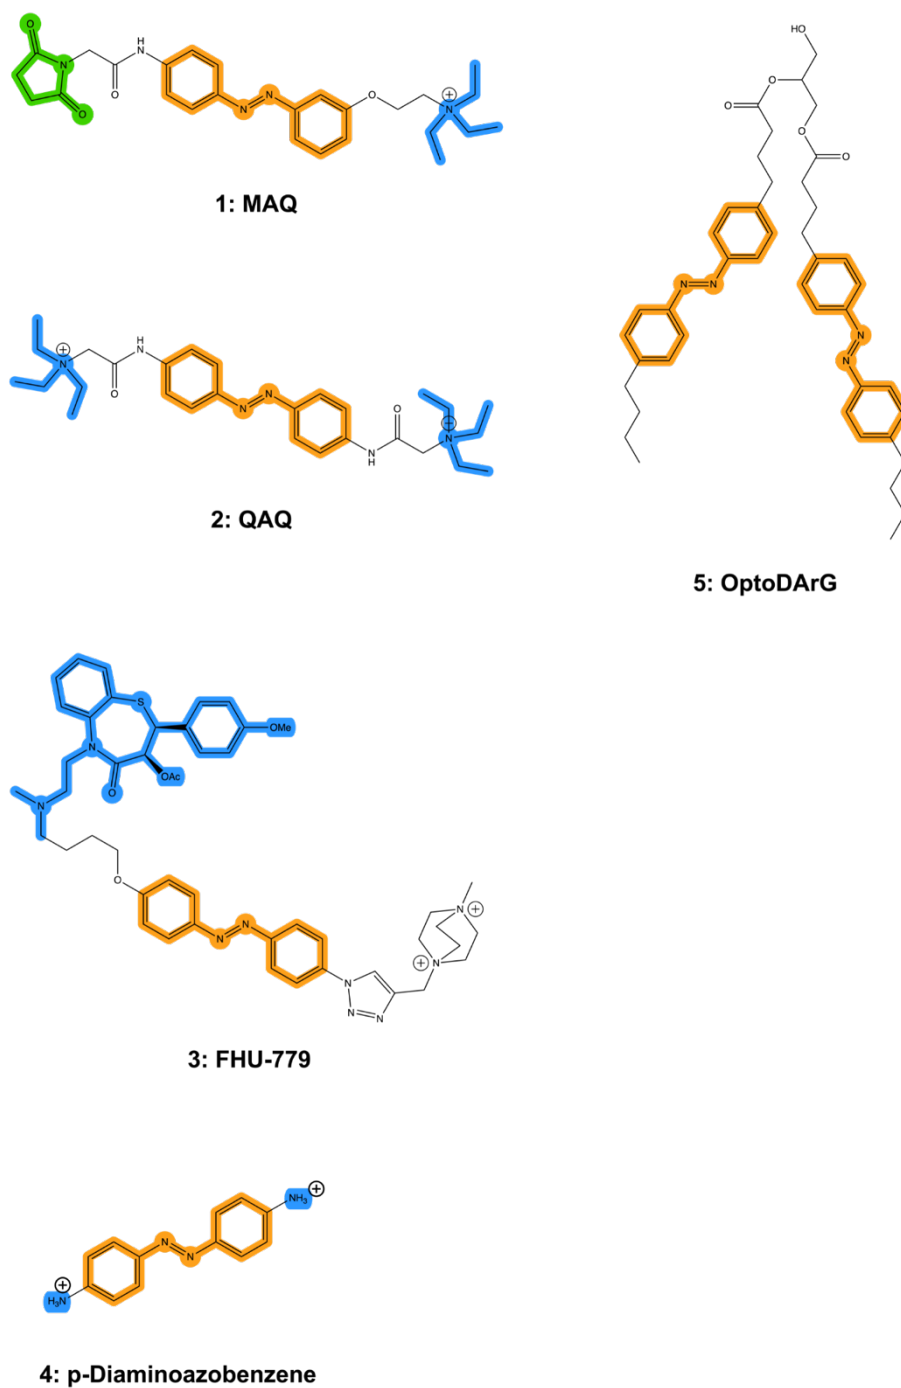

**Figure S1.** Chemical structures of the PCLs and PTLs targeting voltage-gated ion channels mentioned in the text. The bioactive fragment is colored in blue, the photochromic group (azobenzene, shown in its *trans* form in the figure) in orange and the electrophilic group of PTLs in green.



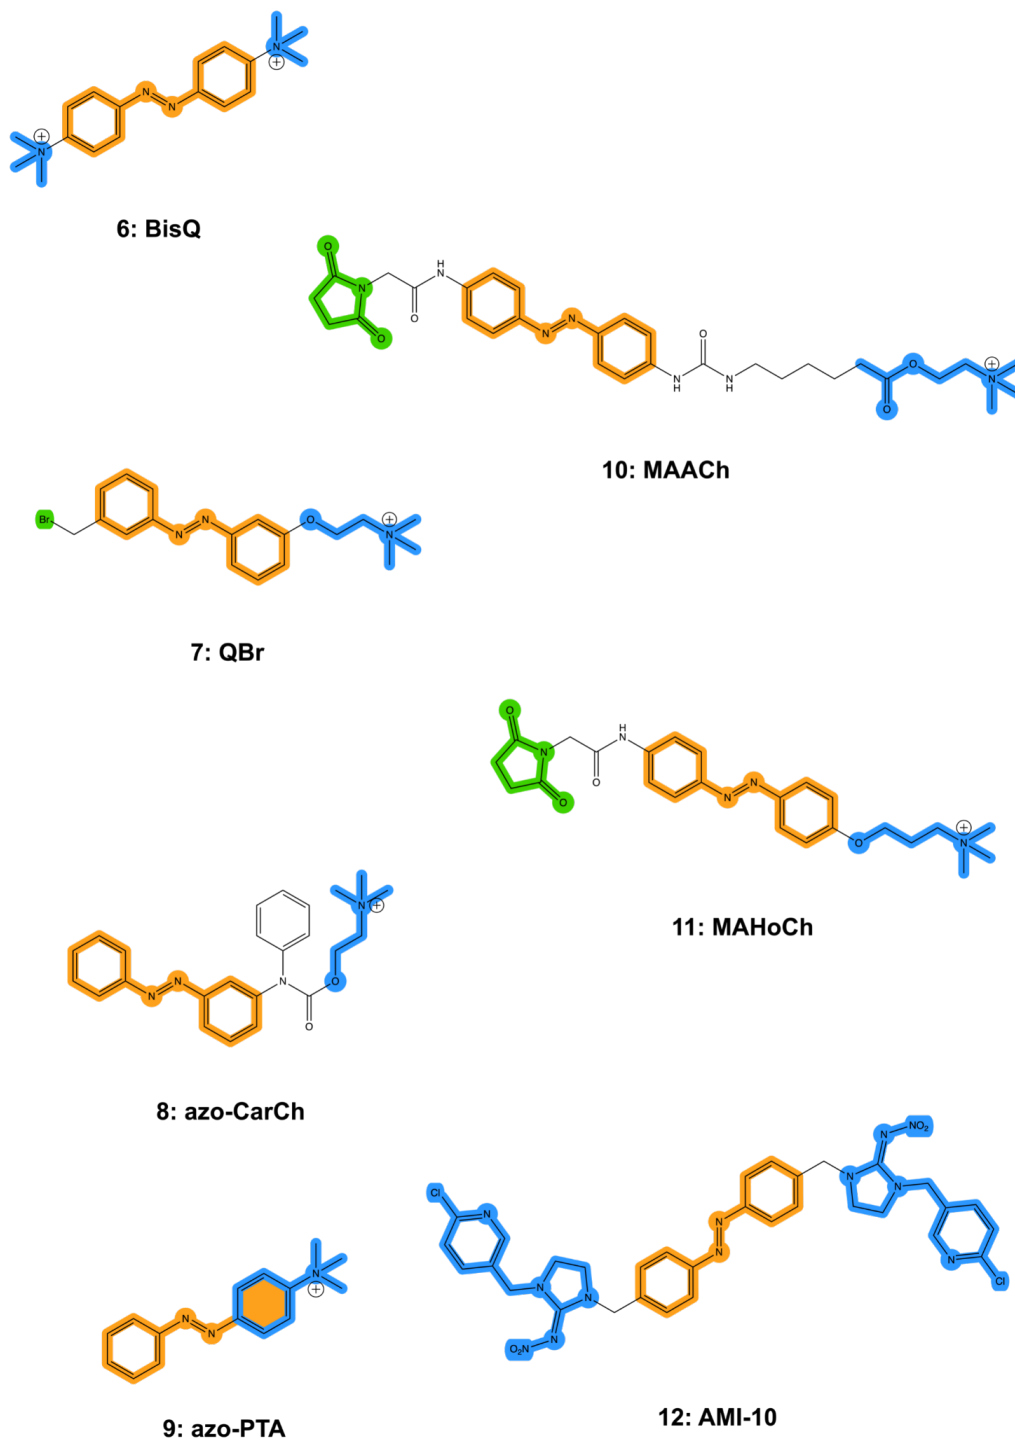

**Figure S2.** Chemical structures of the PCLs and PTLs targeting cationic pentameric ligand-gated ion channels. The same coloring code as in Figure S1 is used. Note that the design of azo-PTA (**9**) capitalizes on the phenyl group already present in the bioactive group (phenyltrimethylammonium) to integrate one of the phenyl rings of the azobenzene photochromic group.

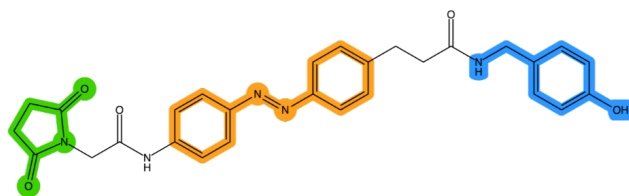

**13: MAB-0**

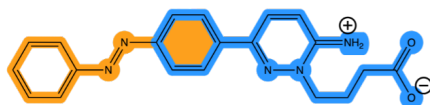

**14: Azogabazine**

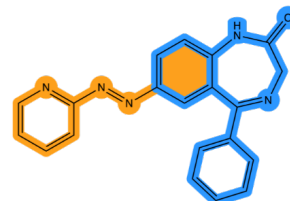

**17: Glyght**

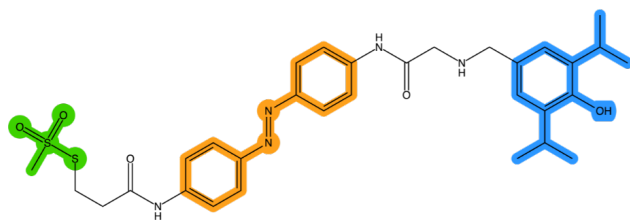

**15: MAP20**

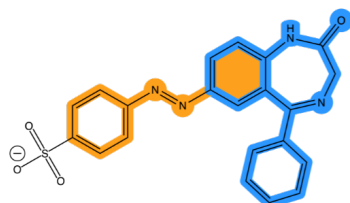

**16: Azo-N1**

**Figure S3.** Chemical structures of the PCLs and PTLs targeting anionic pentameric ligand-gated ion channels. The same coloring code as in Figure S1 is used. Note that the design of azogabazine (**14**), azo-NZ1 (**16**) and Glyght (**17**) capitalize on the phenyl group already present in the bioactive group (gabazine for **14** and nitrazepam for **16** and **17**) to integrate one of the phenyl rings of the azobenzene photochromic group.

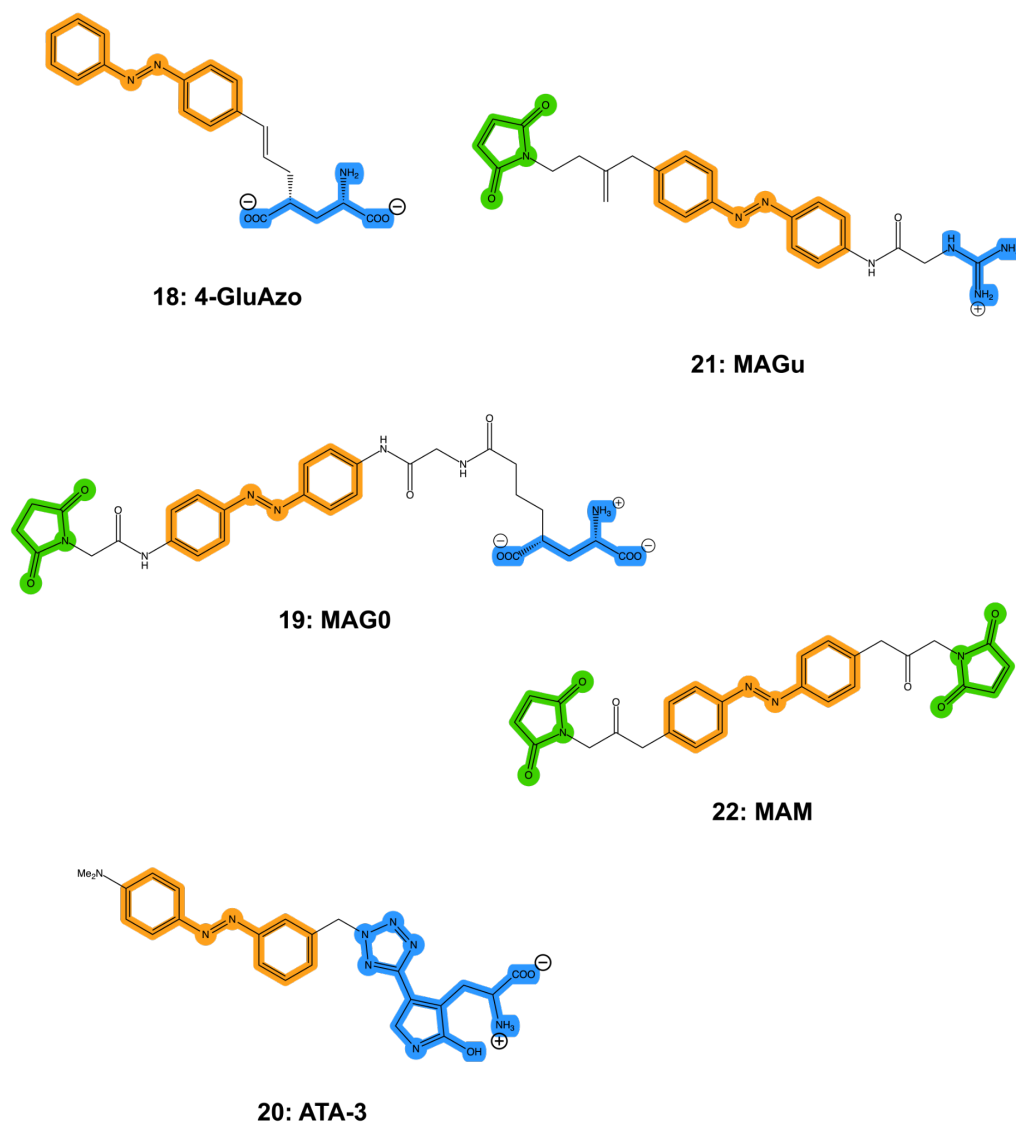

**Figure S4.** Chemical structures of the PCLs and PTLs targeting ionotropic glutamate receptors and ATP-dependent purinergic receptors. The same coloring code as in Figure S1 is used.

## References

1. Mourot, A.; Herold, C.; Kienzler, M. A.; Kramer, R. H. Understanding and improving photocontrol of ion channels in nociceptors with azobenzene photo- switches. *Brit. J. Pharmacol.* **2018**, *175*(12), 2296-2311.
2. Fehrentz, T.; Huber, F. M.; Hartrampf, N.; Bruegmann, T.; Frank, J. A.; Fine, N. H.; Malan, D.; Danzl, J.G.; Tikhonov, D. B.; Sumser, M.; Sasse, P.; Hodson, D.J.; Zhorov, B.S.; Klöcker, N.; Trauner, D. Optical control of L-type  $\text{Ca}^{2+}$  channels using a diltiazem photoswitch. *Nature Chem. Biol.* **2018**, *14*(8), 764-767.
3. Palmisano, V.F.; Gómez-Rodellar, C.; Pollak, H.; Cárdenas, G.; Corry, B.; Faraji, S.; Nogueira, J.J. Binding of azobenzene and p-diaminoazobenzene to the human voltage-gated sodium channel Nav1.4. *Phys. Chem. Chem. Phys.* **2021**, *23*(5), 3552-3564.
4. Lichtenegger, M.; Tiapko, O.; Svobodova, B.; Stockner, T.; Glasnov, T.N.; Schreibmayer, W.; Platzer, D.; de la Cruz, G.G.; Krenn, S.; Schober, R.; Shrestha, N. An optically controlled probe identifies lipid-gating fenestrations within the TRPC3 channel. *Nature Chem. Biol.* **2018**, *14*(4), 396-404.
5. Tochitsky, I.; Banghart, M.R.; Mourot, A.; Yao, J.Z.; Gaub, B.; Kramer, R.H.; Trauner, D. Optochemical control of genetically engineered neuronal nicotinic acetylcholine receptors. *Nature Chem.* **2012**, *4*(2), 105-111.
6. Xu, Z.; Shi, L.; Jiang, D.; Cheng, J.; Shao, X.; Li, Z. Azobenzene modified imidacloprid derivatives as photoswitchable insecticides: Steering molecular activity in a controllable manner. *Sci. Rep.* **2015**, *5*(1), 1-8.
7. Melis, C.; Bussi, G.; Lummis, S.C.; Molteni, C. Trans–cis switching mechanisms in proline analogues and their relevance for the gating of the 5-HT<sub>3</sub> receptor. *J. Phys. Chem. B* **2009**, *113*(35), 12148-12153.
8. Crnjar, A.; Comitani, F.; Hester, W.; Molteni, C. Trans–cis proline switches in a pentameric ligand-gated ion channel: how they are affected by and how they affect the biomolecular environment. *J. Phys. Chem. Lett.* **2019**, *10*(3), 694-700.
9. Lin, W.C.; Davenport, C.M.; Mourot, A.; Vytla, D.; Smith, C.M.; Medeiros, K.A.; Chambers, J.J.; Kramer, R.H. Engineering a light-regulated GABA<sub>A</sub> receptor for optical control of neural inhibition. *ACS Chem. Biol.* **2014**, *9*(7), 1414-1419.
10. Mortensen, M.; Huckvale, R.; Pandurangan, A.P.; Baker, J.R.; Smart, T.G. Optopharmacology reveals a differential contribution of native GABA<sub>A</sub> receptors to dendritic and somatic inhibition using azogabazine. *Neuropharmacology* **2020**, *176*, 108135.
11. Borghese, C.M.; Wang, H.Y.L.; McHardy, S.F.; Messing, R.O.; Trudell, J.R.; Harris, R.A.; Bertaccini, E.J. Modulation of  $\alpha 1\beta 3\gamma 2$  GABA<sub>A</sub> receptors expressed in *X. laevis* oocytes using a propofol photoswitch tethered to the transmembrane helix. *Proc. Natl. Acad. Sci. USA* **2021**, *118*(8), e2008178118.
12. Maleeva, G.; Wutz, D.; Rustler, K.; Nin- Hill, A.; Rovira, C.; Petukhova, E.; Bautista-Barrufet, A.; Gomila- Juaneda, A.; Scholze, P.; Peiretti, F.; Alfonso- Prieto, M.; König, B.; Gorostiza, P.; Bregestovski, B. A photoswitchable GABA receptor channel blocker. *Brit. J. Pharmacol.* **2019**, *176*(15), 2661-2677.
13. Maleeva, G.; Nin-Hill, A.; Rustler, K.; Petukhova, E.; Ponomareva, D.; Mukhametova, E.;

- Gomila, A.M.; Wutz, D.; Alfonso-Prieto, M.; König, B.; Gorostiza, P. Subunit-specific photocontrol of glycine receptors by azobenzene-nitrazepam photoswitcher. *eNeuro* **2021**, *8*(1), ENEURO.0294-20.2020.
14. Gomila, A.M.; Rustler, K.; Maleeva, G.; Nin-Hill, A.; Wutz, D.; Bautista-Barrufet, A.; Rovira, X.; Bosch, M.; Mukhametova, E.; Petukhova, E.; Ponomareva, D. Photocontrol of endogenous glycine receptors in vivo. *Cell Chem. Biol.* **2020** *27*(11), 1425-1433.
  15. Reiter, A.; Skerra, A.; Trauner, D.; Schiefner, A.. A photoswitchable neurotransmitter analogue bound to its receptor. *Biochemistry* ,**2013** *52*(50), 8972-8974.
  16. Guo, Y.; Wolter, T.; Kubař, T.; Sumser, M.; Trauner, D.; Elstner, M. Molecular dynamics investigation of *gluazo*, a photo-switchable ligand for the glutamate receptor GluK2. *PLOS One* **2015**, *10*(8), e0135399.
  17. Numano, R.; Szobota, S.; Lau, A.Y.; Gorostiza, P.; Volgraf, M.; Roux, B.; Trauner, D.; Isacoff, E.Y. Nanosculpting reversed wavelength sensitivity into a photoswitchable iGluR. *Proc. Natl. Acad. Sci. USA* **2009**, *106*(16), 6814-6819.
  18. Wolter, T.; Steinbrecher, T.; Trauner, D.; Elstner, M. Ligand photo-isomerization triggers conformational changes in iGluR2 ligand binding domain. *PLOS One* **2014**, *9*(4), e92716.
  19. Lemoine, D.; Mondoloni, S.; Tange, J.; Lambolez, B.; Faure, P.; Taly, A.; Tricoire, L.; Mouro, A. Probing the ionotropic activity of glutamate GluR2 receptor in HEK cells with genetically-engineered photopharmacology. *eLife* **2020**, *9*, p.e59026.
  20. Habermacher, C.; Martz, A.; Calimet, N.; Lemoine, D.; Peverini, L.; Specht, A.; Cecchini, M.; Grutter, T. Photo-switchable tweezers illuminate pore-opening motions of an ATP-gated P2X ion channel. *eLife* **2016**, *5*, e11050.
